# Supplementary material for: Functional analysis across model systems implicates ribosomal proteins in growth and proliferation defects associated with hypoplastic left heart syndrome
Source: eLife. 2025 Dec 11;14:RP106231. doi: 10.7554/eLife.106231 (PMC12698088; doi:10.7554/eLife.106231)
Supplement: Supplementary file 1. [file elife-106231-supp1.xlsx]

## Sheet: Sheet1
Supplemental Table 1
Gene Name	Normalized % EdU+CM	Normalized Tot Cell num
MEX3B	2.14049	1.183
KRTAP5-9	1.80173	0.922128
CDKN1A	1.79644	1.29656
HECTD3	1.77666	1.1817
ETV7	1.7555	0.979883
CDKN1B	1.73476	1.02855
PCGF6	1.72836	1.122
SH3RF3	1.7237	1.13433
USP28	1.70944	1.06879
KCTD14	1.70819	1.00389
TP53	1.69311	1.14536
KRT33B	1.66604	1.03281
SLCO6A1	1.66139	1.07398
OR14A16	1.65405	1.06399
INPP5A	1.65253	1.05711
TBC1D10C	1.6421	1.05792
ALDH9A1	1.64085	1.14276
ITGAL	1.63296	0.870214
SLC3A2	1.62571	1.08112
TTYH1	1.61751	1.07008
TCTN1	1.61445	1.17699
PPAP2B	1.61398	1.01947
SEC22B	1.60794	0.931551
PIK3C2B	1.60391	0.979234
UBE2J2	1.59453	1.17262
PPAP2A	1.58726	1.04672
TRIP12	1.58295	1.09345
TNK1	1.57832	1.06619
GRIN3B	1.56096	1.07463
SCN9A	1.55747	1.00844
OXGR1	1.55581	0.872161
BRDT	1.55517	1.00649
TRIM71	1.55361	1.19663
ISOC2	1.54708	1.04283
RNASE7	1.54559	0.985075
HS3ST1	1.54245	0.903958
RAB13	1.53762	1.01103
DUSP14	1.53694	1.2096
GRIN3A	1.53662	0.914341
SEPHS1	1.53499	1.16937
CRABP2	1.53004	1.03699
PGK1	1.52848	0.996106
PCSK2	1.52685	1.09864
UBE2D4	1.52645	1.01493
NUDT12	1.52391	1.0026
CASP2	1.52218	1.10902
DUSP28	1.52082	1.11786
KCNT2	1.52024	0.973394
MTRR	1.52012	1.08241
FAM45B	1.51631	1.07493
KLF16	1.51258	1.04543
TNFRSF10D	1.51247	1.05256
CLOCK	1.51185	1.0318
RNF208	1.51144	1.06035
POLA1	1.51061	1.05386
AK2	1.50844	1.08371
ARSH	1.5071	0.988968
PPIP5K1	1.50604	1.04997
SLC16A11	1.50337	1.08829
SRPX2	1.50265	1.07371
ZAK	1.50113	1.00714
PMP2	1.50055	1.05184
SPINK1	1.49774	1.01298
IFNAR1	1.49733	0.895522
TLE4	1.49679	0.813757
GAL3ST2	1.49048	0.924724
PRCP	1.48983	0.907203
P2RY10	1.48748	0.887086
CSNK2B	1.48608	1.1791
SLC17A6	1.48509	1.07917
ADA	1.48411	1.07268
PPM1K	1.48172	1.12849
PAK1	1.47961	1.15899
FFAR4	1.47857	0.986372
DDR1	1.478	1.00844
KHDC1	1.47691	1.00162
ZNF526	1.47093	0.880096
PTPN1	1.47006	1.07203
GON4L	1.46975	0.988254
CCDC144NL	1.46761	1.1373
AGL	1.46696	1.10707
ARHGAP35	1.4669	1.0889
PRKAA2	1.46563	0.903958
NPBWR1	1.46507	0.84231
MCCD1	1.46499	0.894289
CDK17	1.46364	1.06944
UCHL3	1.46269	1.13952
DYRK1A	1.46181	0.972096
B3GAT3	1.45873	0.84231
KLK13	1.45306	1.06619
PDE7A	1.45304	1.15445
MET	1.45221	1.13303
PON2	1.45121	1.01233
GPR108	1.45078	0.791694
CHD8	1.44805	1.06619
FAM221A	1.44656	0.962738
ASB9	1.44504	0.97599
ZNF398	1.44497	0.927969
GALNT7	1.44483	0.990915
FCGR3B	1.44427	0.998702
SLC26A7	1.44252	1.07398
CAMK2N2	1.44241	1.04131
HSF5	1.43948	0.99757
CRHR2	1.43894	0.931862
SLC41A1	1.43561	0.952628
GAPDHS	1.43461	1.03894
KNCN	1.43398	1.09923
RASD1	1.43291	1.15574
PPP2R2A	1.43222	0.902661
CYBB	1.42969	1.03504
ILK	1.42844	0.994809
CPOX	1.42649	1.11226
PVRL4	1.4256	1.02754
CBLB	1.42419	0.802726
UFC1	1.42394	1.04672
LPPR4	1.42332	0.885788
RNPEPL1	1.42099	0.909799
NUDT5	1.42048	0.992862
KAL1	1.42016	0.925373
CHRNA4	1.4188	0.971447
SETD1A	1.41732	1.08177
EAPP	1.41596	1.08262
PHF10	1.41391	0.978585
DMKN	1.41327	0.99271
HAO1	1.41282	1.07008
ASIC3	1.41231	1.01752
SCRN1	1.41182	1.07463
NME6	1.41126	1.18105
CCT8L2	1.4101	1.05321
SAT1	1.41001	1.10253
PTPN14	1.40935	1.122
MYOM2	1.40805	0.989064
COX15	1.40784	1.15188
ERLEC1	1.40779	1.06399
ZDHHC19	1.40642	1.03083
LMNB1	1.40607	1.2309
MST1R	1.40552	1.03764
NRD1	1.40459	0.985075
KCTD15	1.4045	1.1525
NT5C	1.4044	0.935756
NR1H4	1.40197	1.10123
MIPOL1	1.40191	0.84481
SMC3	1.40071	1.06642
MFSD4	1.40062	1.07533
CRISP3	1.40061	1.10826
ATRX	1.39997	0.892927
GBE1	1.39864	1.00454
SFTPC	1.39787	0.993834
COX4I2	1.39774	1.00519
TRIM11	1.39621	1.10578
RSPH3	1.39585	0.836245
EREG	1.39552	0.87281
CRAT	1.3949	0.896171
PTPRG	1.39452	1.0305
SLC10A7	1.39399	0.892927
TXNRD3	1.39383	0.981181
HACL1	1.3921	0.932511
BCL2L15	1.39179	0.964714
RHOG	1.39145	1.00973
MTMR6	1.39109	1.0292
TP53RK	1.38955	0.865023
SERTAD2	1.38899	1.10383
PPP1R3A	1.38834	1.03894
CRNN	1.38791	0.900308
GK2	1.38669	1.15574
STS	1.3866	1.04023
ZNF93	1.38632	0.950992
ARHGEF1	1.3862	1.03803
ZNF326	1.38556	1.0081
MMP27	1.38543	0.998702
DOT1L	1.38308	0.888384
PPAPDC2	1.38295	1.0623
WTAP	1.38282	1.07537
ELP3	1.38253	1.02012
DCLK1	1.38195	0.989617
PTPN2	1.38192	1.08241
PARG	1.38112	0.982479
SGPP1	1.38004	1.11486
FAM122A	1.38001	0.91049
FZD5	1.37924	0.991564
SET	1.37907	1.01493
AR	1.37899	1.02661
PTPRD	1.37874	1.06554
KCNK15	1.37752	1.14017
SLC26A5	1.3765	1.0013
GUCY2F	1.37599	1.12979
AK3	1.37586	1.16872
RFWD2	1.37569	0.978585
HIF1A	1.37554	1.02141
DLEC1	1.37469	1.01428
SPAST	1.37451	1.08825
OLFML1	1.37443	1.14986
ADPRM	1.37374	0.90563
DUSP23	1.37305	0.894873
C11orf16	1.37206	1.08153
RYR2	1.37205	0.973394
C9orf50	1.37132	1.07574
CELSR1	1.37122	1.06749
SLC24A2	1.37038	1.06424
LPAR3	1.36953	1.05711
VDAC3	1.36892	1.13563
PIM3	1.36876	1.08112
GTPBP1	1.36832	0.952628
PPP1R7	1.36803	1.10513
NFKBIE	1.36686	1.0279
GUCY2C	1.36555	0.958469
PHF21A	1.36531	1.05646
COX10	1.36526	1.04867
PGC	1.36492	0.998053
SNTN	1.36479	1.03402
MUL1	1.36456	1.06879
KMT2A	1.363	0.983777
ITPR1	1.36214	0.988319
MYOCD	1.362	1.06295
CEP41	1.36186	0.961064
GBA	1.36174	0.949384
PPP1R8	1.36113	1.0597
C12orf65	1.36078	1.09923
ALG2	1.36017	0.974043
PWWP2B	1.35981	0.980154
DEDD	1.35898	1.02227
FOXP2	1.35877	0.756177
CAMTA2	1.35812	1.06064
ACOXL	1.35807	1.01882
OR52D1	1.35751	1.04967
ATAD5	1.35727	0.966788
GNAT1	1.35705	1.01863
PYCRL	1.35704	0.948735
ASUN	1.35664	1.01134
MYOM1	1.35622	0.909901
CAMSAP2	1.35598	1.07574
ALX3	1.35585	1.09929
PPP2R3A	1.35552	1.13108
THTPA	1.35532	1.06424
PRMT7	1.35511	1.10383
KCNK17	1.3543	1.05321
SLC27A3	1.35394	1.08112
ORAOV1	1.35381	1.04796
ATP5E	1.35348	1.00649
PLCH1	1.35304	0.983128
DPYD	1.35301	0.888384
TMEM44	1.35287	0.99433
TYR	1.35271	1.0584
CALML5	1.35268	1.00972
SCN10A	1.35249	1.04672
MMP21	1.35245	0.908501
PPID	1.35245	0.999351
PTPN6	1.35234	1.03894
SLCO4C1	1.35234	1.03894
CP	1.35198	0.97599
CBWD1	1.35187	1.0729
SUMO4	1.3517	0.900308
B3GALNT1	1.35117	0.980532
IGSF22	1.35037	0.993115
EXOC8	1.34997	1.03255
EDEM2	1.34973	1.03699
FAM193B	1.34965	0.91778
MLX	1.34895	1.00195
SGTB	1.34876	1.07605
SEC14L2	1.34866	1.06554
DHX40	1.34862	1.02596
PPP1R16B	1.34813	1.04218
RTN4IP1	1.34673	1.01947
SCN4A	1.34571	1.11551
PPARD	1.34503	0.889682
CFC1B	1.34469	0.99271
CILP	1.3445	0.9695
IZUMO2	1.34442	1.06197
VIPR2	1.34332	0.898767
CHKB	1.34301	1.04218
BAZ2B	1.34275	1.0026
POMT2	1.34027	0.980532
PCDHB1	1.33952	0.942103
PNCK	1.33884	1.04543
CLCC1	1.33871	1.04153
RAB14	1.33869	0.853991
CDA	1.33814	0.866321
CD1B	1.33687	1.15593
CHEK2	1.33661	1.05516
SLC25A36	1.33543	0.948086
TRPM7	1.33536	1.11616
RHCG	1.33532	1.0555
PPP2R5E	1.33497	0.984426
MED12L	1.33415	1.02066
TXNL4B	1.33409	1.14925
CBX8	1.33394	0.981181
DUSP22	1.33394	1.12135
MMP8	1.33384	1.02531
MS4A13	1.3337	1.11614
TRAF6	1.3333	1.12589
DNAL1	1.33296	1.11908
ASB10	1.33244	0.853991
PAIP1	1.3324	1.01038
FZD2	1.33213	0.914341
FGF20	1.33162	0.990915
KCNQ5	1.33004	0.996106
ARID1A	1.32952	0.900065
ATP5O	1.32931	1.02077
SMYD4	1.3291	0.982186
ALPK2	1.32901	0.992862
WSCD1	1.32896	1.06966
VN1R1	1.32816	0.93316
AMBRA1	1.32784	1.04625
BRE	1.32783	1.03483
G6PC	1.32749	1.13887
LIF	1.32741	0.897469
GRAMD2	1.32738	1.09455
GATSL3	1.32727	1.00343
LIPA	1.32694	1.00649
TPSD1	1.32635	0.954575
MAPK10	1.32635	1.07138
NFE4	1.3261	1.07571
EXD2	1.32607	0.99109
SLC30A1	1.32518	0.98767
TEX9	1.32491	1.15391
BCKDHB	1.32438	1.00844
DUSP19	1.32404	0.964309
SLC6A14	1.32391	1.10967
FOLR3	1.32378	0.918123
VIL1	1.32355	1.02501
CLDN5	1.32338	1.01576
RAPGEF6	1.32337	0.896171
ENPP7	1.32314	1.03764
HDHD3	1.32296	0.997404
ZNF354A	1.3227	1.08241
HNRNPA1	1.32269	1.11134
ANKRD13C	1.32244	0.864318
KCTD21	1.32013	0.995545
TMPRSS11E	1.31988	1.02401
TPRX1	1.31971	1.03807
ZFP14	1.31912	0.983799
AQP3	1.31872	0.968202
TCERG1	1.31786	0.936405
ADAMTS1	1.31739	0.993511
IRF7	1.31736	1.13952
RPAP1	1.31697	0.979445
TRIAP1	1.31656	1.04212
GRXCR2	1.31632	0.906817
HEMK1	1.31625	0.925373
OBSL1	1.31599	0.995545
IMPA2	1.31495	1.06035
UQCRH	1.31471	1.04023
G6PC2	1.31461	1.08501
MAN2B2	1.31425	0.878001
MBD1	1.3142	1.07722
DPP7	1.31379	0.947437
RERE	1.31379	0.947437
SIK2	1.31378	1.00844
KCNG4	1.31255	1.01752
EFNA1	1.31167	1.08873
AMER1	1.3116	1.06966
CCNT1	1.31153	0.718915
CASR	1.31077	0.900714
FZD9	1.31059	0.941596
ABCB11	1.31002	1.10513
RWDD1	1.30993	1.00959
SLC7A7	1.30981	1.01557
ZNF774	1.30902	1.0891
EPHA4	1.30884	1
NT5C1A	1.30855	1.06554
ACP1	1.30848	1.10642
CCDC144B	1.30815	1.04419
FBP1	1.30811	1.15574
PLCXD2	1.30763	1.1194
POU6F1	1.30746	1.03374
ABCB7	1.30742	0.964309
PRCD	1.30687	1.06304
CCDC24	1.30605	0.982584
UBR1	1.30598	1.14536
IFNK	1.30572	1.0887
DYM	1.30567	1.09032
SLC6A3	1.30552	0.990266
TPH1	1.30498	0.876055
SMC1B	1.30493	0.994809
COX20	1.30469	1.00651
NLGN3	1.30389	1.11032
DPYS	1.30376	1.00389
PTPRO	1.30376	0.86048
FCGR1A	1.30358	1.05321
MPO	1.30337	1.03699
TSG101	1.30331	0.971447
VPREB3	1.30279	0.997259
AKR7L	1.30278	0.861129
MRPL4	1.30271	1.00685
SNCG	1.30239	1.04762
FPR3	1.30229	1.03374
DUSP8	1.30215	1.09539
GLUL	1.30204	0.976104
GPRIN3	1.302	1.06804
MAP4K2	1.30198	0.7878
ABCG4	1.30195	1.06684
F2RL2	1.30164	0.935756
SMURF2	1.30157	0.972745
BACH1	1.30131	1.14536
NLGN4X	1.30123	1.04172
ATP8B2	1.30019	0.792992
STPG2	1.30013	0.915725
OR5L1	1.29989	0.872902
ACSL6	1.29984	1.01103
PXK	1.29931	1.06489
PPP2R2C	1.2992	0.879948
HDHD1	1.29871	0.995457
KCNK18	1.29827	1.07398
INPP5B	1.29817	1.01233
PSKH1	1.29817	1.01233
B3GNT9	1.29815	1
HBE1	1.29811	0.975341
RASA4	1.29796	0.948967
PRLH	1.29778	1.04131
AKR7A2	1.29753	0.987444
TGM7	1.29736	1.13238
XPC	1.29643	0.988968
FAP	1.29602	1.0305
COPS4	1.29595	1.01094
RILP	1.29542	1.03049
EIF4E3	1.29535	1.12589
CHST11	1.29504	0.87865
PRICKLE3	1.29491	1.02726
ARNT2	1.29491	0.987849
CHUK	1.29468	1.03569
MED21	1.29416	0.891629
AIFM3	1.29401	1.00608
ZNF225	1.29385	0.941761
KRBA2	1.2938	1.16889
HMOX1	1.2933	1.07398
COPS2	1.29295	0.979234
TGM2	1.2929	1.01233
PKLR	1.29284	0.842959
FGL2	1.29276	1.0331
KLF13	1.29245	0.950681
ALG3	1.29191	0.922128
UPRT	1.29182	0.985419
ADAMTS19	1.29177	0.97599
RNF2	1.29164	1.06295
FGD5	1.29148	1.00719
LCP2	1.29118	1.11442
NME2	1.29115	1.06749
CCDC115	1.29108	1.11543
EPPK1	1.29081	1.00651
GAL3ST3	1.2908	0.964309
IAPP	1.29065	0.99271
IL5	1.2905	1.11356
BAG6	1.29035	1.10552
CBS	1.29026	0.968851
NARF	1.2901	1.01038
NAALAD2	1.29009	0.83647
SLC22A4	1.29003	0.967598
COMT	1.28999	1.08501
AKR1B15	1.28999	0.938842
CFI	1.28958	1.06879
OR8G1	1.28955	1.02876
MTMR14	1.2894	1.02336
CCR10	1.28934	1.15185
ZNF280B	1.28932	1.10895
ITGA5	1.28873	0.961713
CD74	1.28868	0.982479
PRR14	1.28779	0.938842
TNFSF12	1.28763	1.08736
STK32A	1.28754	1.07463
CYP4F11	1.2875	1.11616
HIST1H4H	1.28724	1.12025
LILRB1	1.28646	1.05062
OR4A16	1.28641	1.03929
SLC25A53	1.2864	0.924289
TAOK3	1.28614	1.06749
GALNT2	1.2855	1.03894
RAB5C	1.28546	0.997404
FUT3	1.28526	0.921426
GPR155	1.28512	0.993511
RIT2	1.28512	0.993511
SRC	1.2851	0.972745
LEKR1	1.28486	1.09032
PPFIA3	1.28481	1.01038
ADCY8	1.28379	0.998702
PKD2L2	1.28317	1.01168
TMEM61	1.28267	1.06966
SFI1	1.28253	0.976704
BDKRB1	1.2825	1.05386
CDK20	1.28245	1.08306
PRICKLE2	1.28242	1.0331
TRAF3IP2	1.28221	1.06683
TPST2	1.28216	1.12914
P2RX5	1.28196	1.03764
MIEF1	1.28189	0.922236
NOMO1	1.28178	1.05913
ITCH	1.28147	1.07138
OAS2	1.2814	1.02141
NSUN5	1.28124	1.08825
GLT8D2	1.28094	0.996755
AADAC	1.28085	0.913325
DEFB108B	1.28034	1.13123
TPSG1	1.28033	0.922128
BSPH1	1.28031	0.933539
SOGA1	1.28019	1.0185
GTF3C4	1.28016	1.11421
IL6R	1.27988	1.01428
TRIM28	1.27988	1.01428
C1QTNF3	1.27944	0.96814
ING1	1.27903	1.1486
TBC1D23	1.2788	1.07128
ABCC10	1.27876	1.04023
CS	1.27857	0.885788
UNC5B	1.27785	0.869565
UBE2Q1	1.27761	1.03699
ATP6V0E1	1.27726	1.07073
GRIK3	1.27715	1.00389
WARS2	1.27698	0.82414
MTMR1	1.27685	1.11291
DCAF17	1.27644	1.05549
ZFP41	1.27635	0.906845
SUCLG1	1.27635	0.7258
THNSL2	1.27633	0.753407
EPM2A	1.27606	1.07592
ADAM15	1.27584	1.10123
TUSC1	1.27547	1.0482
FAM173B	1.27509	0.956835
SCN11A	1.27478	1.04348
SRXN1	1.27461	0.913692
GLRX3	1.27449	1.04577
NPPB	1.27428	1.11097
KIFC2	1.27419	0.909799
PEX14	1.27409	0.985612
CSE1L	1.27405	0.872161
ATPAF1	1.27399	1.00274
HSPA1B	1.27381	1.06944
HBD	1.2735	1.08222
ANAPC5	1.27345	1.06554
TULP2	1.27304	0.881246
CDKN3	1.27292	0.898118
NARS	1.2727	1.12914
BZRAP1	1.27239	0.950325
ABCB1	1.27209	1.10448
MGA	1.27206	0.91641
RUNDC3B	1.27202	0.964029
PAGE1	1.27194	0.99109
ASTL	1.27183	1.00389
STOX1	1.27141	0.985014
MED9	1.27117	1.10369
TMEM154	1.27097	1.01944
BMP15	1.27084	0.950032
TMX1	1.27038	0.849448
IFT27	1.26988	0.97599
TSPAN7	1.26951	1.03362
TRIM33	1.2695	0.824789
RIPPLY3	1.26871	0.969218
SLC33A1	1.2687	0.939001
FKTN	1.26867	1.09627
ETAA1	1.26863	1.05873
FAM83F	1.26831	0.893074
P2RX4	1.26796	1.13757
ALG10B	1.26794	0.863725
ATG5	1.26786	0.914341
DGAT1	1.26786	0.914341
RAB26	1.26786	0.914341
PQBP1	1.26747	0.884207
ZNF142	1.26742	0.996917
KERA	1.26741	0.939363
NT5C1B	1.26738	0.944192
PHC1	1.26725	1.18568
SEMA4B	1.2671	1.04698
HERC4	1.26699	0.864374
SNX29	1.26665	0.90239
GPR39	1.26651	0.776119
KPNA3	1.26651	0.852044
MINPP1	1.26651	1.06295
TESC	1.26647	0.953017
CTXN3	1.26627	0.998785
KCTD6	1.26614	1.10967
RABGEF1	1.26614	1.0298
MBD2	1.26608	0.949384
PARP10	1.26583	1.04967
GIYD1	1.26569	1.16752
NGLY1	1.26568	0.98767
ANXA3	1.26558	0.878001
ZC3H13	1.2652	0.869178
PTPN11	1.26513	0.89098
TRMT1L	1.26488	1.00519
FAM105A	1.26488	1.0162
RING1	1.26477	0.946139
TREML4	1.26449	1.08667
PRIM2	1.26441	0.97599
METTL22	1.26405	1.03645
WDTC1	1.26403	1.11134
GPR112	1.26382	1.06944
RENBP	1.2635	1.09085
SLC37A1	1.2634	1.05711
TRMU	1.26323	0.875406
HMGCS2	1.26259	1.04932
HYOU1	1.26241	0.901363
RPL22	1.2624	1.15827
NDUFV3	1.26239	1.04762
CLASRP	1.26224	1.04282
MTRF1L	1.2618	0.969623
MYL5	1.26179	1.0555
MPPED2	1.26174	1.0331
RNASEH2C	1.26153	0.904415
CYP19A1	1.26149	1.06295
HDLBP	1.26137	1.11811
AQP4	1.26124	1.1778
HAAO	1.26097	0.889682
PPIF	1.26096	1.02754
MYL6B	1.26094	1.02592
PPP1R1C	1.26091	0.953277
FZR1	1.26087	1.02672
FAM45A	1.26078	1.09478
LHFPL2	1.26062	1.04672
CHST14	1.26059	0.902661
BCHE	1.26029	1.1233
SYNJ1	1.26016	0.970798
MAP3K13	1.25979	1.03894
MOK	1.25979	1.03894
PSMB6	1.25953	0.941596
TBRG1	1.25943	1.03529
TSGA10	1.25942	0.946557
ABTB1	1.25938	0.979883
APOH	1.25938	0.979883
CCR6	1.25913	0.946139
G6PC3	1.25899	0.929267
SCN3A	1.25875	1.00584
STAG2	1.2586	1.02364
DRICH1	1.2583	1.08546
MEOX2	1.25828	1.04867
ZNF804A	1.25802	0.965978
C2orf71	1.258	1.03159
POP7	1.25772	1.12135
C12orf54	1.25768	1.01053
MAPK12	1.25755	0.917586
HLX	1.2575	1.04932
DUSP5	1.2574	0.947437
BAHD1	1.25728	1.02401
CRISP1	1.2572	0.985269
TAC3	1.25713	1.00714
CHDH	1.25697	0.990266
SPSB1	1.25684	1.02012
RASSF10	1.25672	1.05481
SLC9C2	1.25663	0.877013
CCNYL1	1.25656	1.06561
DARS2	1.25655	1.09518
IFNA6	1.25627	1.03666
NEU3	1.25611	0.829332
CUL3	1.25607	0.944192
RPRM	1.25607	0.944192
USP49	1.25598	0.897469
DCLK2	1.25587	1.00389
TTLL10	1.25582	1.04982
PSAT1	1.25559	0.978585
MCM3AP	1.25557	0.938335
OXSM	1.25555	1.00567
IMPA1	1.25513	1.1194
IL17A	1.25508	0.979749
RBM47	1.25489	1.02295
CASP3	1.25478	1.08566
GLYATL1	1.2547	1.00909
GRK1	1.2546	1.00065
TICRR	1.25457	0.871608
SLC35F2	1.25451	0.991093
EDNRA	1.2545	0.924075
TRNT1	1.25445	1.02206
ZMPSTE24	1.25445	0.953926
RFC5	1.25413	0.745241
C7orf60	1.25409	1.0891
TMEM74	1.25401	1.00527
TOR1A	1.254	1.01817
B3GALT4	1.25383	1.06944
POLR3B	1.25376	1.03115
HTRA3	1.25365	1.15055
PMM1	1.25352	1.04413
KCNMB3	1.25334	0.967554
KDM7A	1.25308	1.04023
VSNL1	1.25294	0.868448
PRKAR2B	1.25287	0.903958
USP53	1.25274	0.895522
PFKM	1.25264	1.15574
SUV420H2	1.2522	1.0623
TOMM20L	1.25212	0.971908
NME4	1.25201	1.10513
ADAMTSL5	1.25167	1.13406
PPP1R13B	1.2515	0.930565
TYW3	1.25145	0.865533
OPRM1	1.2514	1.0331
SLC19A2	1.25136	0.922128
PRSS50	1.25123	0.994809
F13A1	1.25114	1.01622
TBX1	1.25107	1.03764
C1RL	1.25085	1.10188
NGEF	1.25076	0.891059
SPATA19	1.25074	0.951802
ODF1	1.25057	1.03443
AFP	1.25055	1.00389
ACAT1	1.25054	1.15769
PHF1	1.25048	0.922777
GAPT	1.25015	1.03807
CABYR	1.25003	0.956149
CACNA1D	1.24955	0.944841
KANK3	1.2494	1.0486
IQCH	1.24898	1.09356
MAGT1	1.24882	1.12839
CAPN6	1.24878	1.11226
BAGE5	1.24862	0.907503
LDLRAP1	1.24859	1.09721
SLC2A14	1.24843	1.02271
STRBP	1.24843	1.07674
SERINC5	1.24842	1.06926
STK25	1.2483	0.992862
NSMAF	1.24827	1.06817
TIPARP	1.24822	1.07852
C20orf144	1.24815	1.11908
SLC18A3	1.24807	0.868916
ATR	1.24792	0.817651
LMTK3	1.24785	0.924724
QRFPR	1.24776	1.09604
PMPCB	1.24765	0.980532
PCDHB16	1.24761	1.04385
FAT4	1.24748	1.08991
TSR2	1.24737	1.16444
CHRNA2	1.24732	1.13498
NR1I2	1.24732	1.11356
RAD21	1.24732	0.899416
CHST1	1.24717	1.04088
GAP43	1.24707	1.03186
OR2W3	1.24703	1.03563
OR52B6	1.24686	1.10175
MAGI3	1.24661	0.908501
C17orf103	1.24654	0.965057
FSTL3	1.24649	1.06098
ADARB1	1.24641	1.06295
CABLES2	1.24621	0.981501
CABLES1	1.24617	1
RAB42	1.24613	1.03645
DOPEY1	1.24604	1.14581
PPIB	1.24595	1.05905
TIMM50	1.24592	1.03764
TRIM59	1.24582	0.973394
TADA3	1.24561	1.04218
BUB3	1.2454	1.01233
INPP5J	1.24539	1.08955
RCC2	1.24536	1.00959
MGAT4B	1.24527	0.948086
DSG2	1.24504	1.11956
TMC5	1.24477	0.966427
SLC25A41	1.24475	1.11219
BTNL3	1.24443	0.955464
C2orf66	1.24435	1.02912
ZC3H12A	1.24434	1.0081
NAGPA	1.24429	0.961713
SLC5A6	1.24423	0.996106
SYF2	1.24397	1.11786
PPP6C	1.24392	1.00065
SLC22A10	1.24386	0.922236
SLC30A5	1.24355	1.07398
DIABLO	1.24334	0.975341
DHX16	1.2432	0.863725
C6orf120	1.24291	1.00034
GOLGA6B	1.24289	1.01094
ATP1B1	1.24289	1.09604
CHAF1A	1.24289	0.90968
ECHDC2	1.24262	1.11908
RASL12	1.24252	1.04478
TMEM110	1.24249	1.01458
SLC17A8	1.24242	1.05775
SLMO2	1.24232	0.81045
ASB12	1.24219	0.946139
SEPT5	1.24207	0.924724
PRDX1	1.24195	1.05386
PINX1	1.24177	1.02501
ZNF99	1.24158	0.962658
GALP	1.24154	0.945187
TLDC1	1.24132	1.03289
OMD	1.24084	0.936965
AGPAT4	1.24064	0.968851
NXT1	1.24057	0.887086
C17orf67	1.24055	1.0644
PTGS2	1.24026	0.986372
PDK4	1.24021	1.04672
TPM4	1.24021	1.04672
VPS36	1.24008	1.0648
HSPB6	1.23996	0.897568
SPINK7	1.23995	1.02997
PROCA1	1.23994	1.00274
ALPP	1.23984	1.01687
PSTPIP2	1.23981	0.918591
MGAT4A	1.23978	1.0401
BAHCC1	1.23969	1.02187
SCYL2	1.23964	1.00527
PSORS1C1	1.23962	1.08565
GJA9	1.23936	1.01215
C5orf38	1.23928	0.859052
ZBTB1	1.23912	0.995889
LRP2	1.23901	1.09085
OR52M1	1.23888	1.02741
KCNF1	1.23884	1.06944
LOC653978_pseudogene	1.23884	1.06944
TPST1	1.2388	1.08241
ACN9	1.23869	0.996232
MDK	1.23858	1.09275
LIG1	1.23854	1.01363
DLGAP4	1.23843	1.01458
ENC1	1.23832	1.07852
FIGNL1	1.23828	0.989037
RPL3L	1.23827	1.15827
GLO1	1.23813	1.05711
NT5M	1.23813	1.05711
NDUFA4L2	1.23812	1.14341
PTH1R	1.23805	1.16937
MDGA1	1.23798	0.936622
C11orf24	1.23769	0.928058
C9orf66	1.23769	1.00206
CREB1	1.23747	1.01882
SNX32	1.23733	1.05002
TTC12	1.2372	1.04385
EYS	1.23714	0.992463
BTRC	1.23713	0.937054
RRH	1.23713	0.937054
IL4I1	1.2371	0.950032
GLT1D1	1.23693	1.0279
ATP8B1	1.23678	0.829332
SLC27A6	1.23662	0.907203
COBLL1	1.23657	1.01944
DHCR7	1.23645	0.998053
FKBP7	1.23643	1.01103
PDP2	1.23631	0.911746
AQR	1.23629	0.997975
SLC12A8	1.23616	0.949298
ODF4	1.23615	0.979445
BCKDK	1.23608	1.08047
PIAS2	1.23583	1.08501
PRODH2	1.2356	1.0636
WASF3	1.23525	1.21514
DYNLRB1	1.23514	0.916937
MYCBP2	1.23514	0.916937
CACNA1B	1.23514	0.929916
ZNF681	1.23513	0.873633
C15orf41	1.23498	0.883759
CD164	1.23481	0.623501
EIF1B	1.23456	0.939001
SPOCD1	1.23455	1.04617
HOXD9	1.23447	0.977724
NDST3	1.23446	0.832321
CLEC2A	1.23446	1.01096
DUX4	1.23446	1.00719
ZNF80	1.23443	1.04293
C6orf58	1.23441	0.989469
USP14	1.23439	1.17716
MATN2	1.23422	1.04008
SPATA21	1.23422	1.07655
AMMECR1L	1.23402	1.04496
HIBADH	1.23364	0.887735
CDK3	1.23356	1.03504
APOBEC3C	1.23347	0.970149
C3orf18	1.23339	0.861482
LMOD1	1.23321	1.06989
THYN1	1.23315	0.920211
ALDOA	1.23314	0.935756
GGT1	1.23312	1.08306
KLHDC9	1.23311	0.829891
CYP2C18	1.23309	0.909799
CCKBR	1.23296	0.992213
DNAL4	1.23295	0.844906
ROCK2	1.23284	1.06165
AKAP10	1.23281	1.04867
C2CD3	1.23269	0.792052
CHORDC1	1.23246	1.03905
ACKR4	1.23245	1.0013
TTBK1	1.23232	0.949384
RGS10	1.2323	1.07655
TSPAN15	1.23227	1.06318
HUS1	1.23224	1.12719
SREK1IP1	1.23215	1.11017
NAALADL1	1.2321	0.776119
KCNIP1	1.23209	0.871512
TRIM41	1.23205	0.953926
RXFP1	1.23186	0.984426
ITPKB	1.23175	1.20571
GUSBP2	1.23173	0.956492
HIC1	1.23173	1.0279
ATP6V1F	1.23168	1.09734
KRTAP4-12	1.23166	1.13406
TTC6	1.23162	1.06749
BTK	1.23149	1.03245
SLC25A18	1.2314	1.00649
CAPN11	1.23123	0.88514
PARP15	1.23121	1.01215
MAP2K2	1.231	0.833225
ST14	1.23086	1.07203
DBH	1.23081	1.05905
TRPC5	1.2308	0.989617
TFF2	1.23077	0.942103
DQX1	1.23077	0.997602
XYLB	1.23068	1.08955
ANKRD37	1.2306	1.13001
KRT25	1.23052	0.99595
FAM114A1	1.23047	1.05468
SERPINA13P	1.23036	0.973964
AQP1	1.23018	0.972745
PTS	1.23001	1.10318
LMBR1L	1.22995	1.17369
MEMO1	1.2299	1.14743
HRNR	1.22981	1.00343
CD36	1.22972	0.938352
C5orf20	1.22968	0.81207
IGFBP5	1.22963	1.11339
MARCH9	1.2295	0.899416
RBBP6	1.22921	0.947437
SCNN1G	1.2292	1.13433
NR4A1	1.22919	0.990915
OLR1	1.22914	0.953422
RRAD	1.22901	1.05191
UGT8	1.22898	1.05427
EPO	1.22884	1.02569
RNASEK	1.22871	1.00685
BAI3	1.22863	1.0305
SENP2	1.22863	1.0305
HCN1	1.22862	0.943543
PTPRJ	1.22823	1.00909
TGFBR3	1.22817	1.03958
PPP1R3C	1.22816	0.87865
SMARCA5	1.22811	1.07008
KHK	1.2281	1.18754
DNAJC11	1.22808	0.88729
MAF	1.22793	0.926671
ATP1A2	1.22792	0.809215
GRIN2A	1.22781	1.25308
N4BP2	1.22776	1.09215
ARG2	1.22758	0.918235
SLC7A3	1.22714	0.970798
ZNF304	1.22712	0.978534
MTHFS	1.22711	1.0013
CLIC3	1.2271	0.89682
ULK4	1.22701	0.988319
ELL3	1.22698	1.01713
KLRK1	1.22689	1.03871
EMR2	1.22684	1.06684
ADAM29	1.22674	1.05386
LYRM4	1.22667	1.04617
KRBOX4	1.22661	0.978939
PPM1F	1.22643	1.01493
AKAP6	1.22621	0.988968
TCF7L2	1.22621	0.988968
HIST1H4L	1.22599	0.986297
PPP1R14C	1.22565	0.981501
PLEKHA4	1.22556	1.02843
ZNF500	1.22523	0.929526
NAPEPLD	1.22508	1.1207
CCR1	1.22501	0.950681
PTPRA	1.22473	1.00324
MRGPRX1	1.22469	1.05127
RCE1	1.22455	0.959766
C7orf31	1.22449	0.854402
STXBP4	1.22427	1.05995
LSR	1.22406	1.06489
FAM179A	1.22389	0.873228
WDR61	1.22382	0.788983
OPTC	1.22379	1.00648
GGA3	1.22376	0.967797
SLC27A4	1.22375	0.974484
HSD17B6	1.2237	0.869988
ASB16	1.22359	1.0915
DHX38	1.22358	0.995457
PNKD	1.22349	0.916937
GALNT3	1.22347	1
EFCAB2	1.22335	1.04901
GIMAP1	1.22335	0.946132
C20orf24	1.2233	1.07982
FRYL	1.22312	1.04415
PPP3R1	1.22305	0.86048
GEMIN5	1.22269	0.953409
OR2F2	1.22264	0.992806
MRPL11	1.22259	0.967455
LRRC26	1.22256	0.992305
FAM171B	1.22247	1.12881
OR11G2	1.22245	1.04248
SLC2A1	1.22235	1.1538
MLLT1	1.22234	0.93965
NHLRC1	1.22234	0.93965
PTPLB	1.22231	1.02271
CFC1	1.22224	1.03631
ATP6AP2	1.22208	1.0555
PAGE2	1.22193	1.0401
MIEF2	1.2219	1.00103
AIDA	1.22187	1.06885
FAM111B	1.22176	1.02673
C11orf65	1.22167	1.01499
DBX1	1.22161	0.954232
KCNA6	1.22161	0.988319
SMG7	1.22147	0.981369
NUAK1	1.22128	1.06295
TRIM22	1.22124	0.844257
CEP164	1.22118	0.956258
MTNR1B	1.22116	1.01493
PAGE2B	1.22114	0.985014
MIS18A	1.22102	1.03734
DENND2A	1.22094	1.06966
CDO1	1.22088	0.833131
PLXNA4	1.22083	1.12459
CHRNA6	1.22065	1.12914
KIF2C	1.22057	1.02855
WIBG	1.22054	1.10045
C3orf33	1.22022	0.987444
UPK3A	1.2202	0.918465
CCDC134	1.2196	0.947347
GADD45G	1.21939	0.93316
MCL1	1.21939	0.93316
NAP1L4	1.21918	1.02552
DUSP7	1.21884	1.03439
FMN2	1.21884	1.03666
GNAI3	1.21874	0.911746
SDK2	1.21871	1.02912
ZNF121	1.21859	0.881466
SLC50A1	1.21859	0.995545
DAGLB	1.21858	0.968851
SLC1A3	1.21843	1.00844
MRPS21	1.21829	1.05242
AP3M2	1.21787	1.01199
FAM151B	1.21778	0.967455
SPRN	1.21776	0.903734
VAMP2	1.21774	1.09113
OASL	1.21766	0.916937
FLYWCH2	1.21766	1.02364
USP42	1.21742	0.996106
RMND5A	1.21732	0.991495
WARS	1.21723	1.00065
CPLX2	1.21706	0.975677
N6AMT2	1.21704	0.940867
SEC16A	1.21704	1.07982
SOX9	1.21665	1.07138
TCF19	1.21643	1.0584
ZBTB7C	1.21618	1.12475
TMEM159	1.21587	0.948562
ASIC5	1.2157	1.11616
NECAB2	1.2157	0.986982
REM1	1.21568	1.07938
NCAN	1.2154	0.967598
PROM2	1.21527	1.05062
CRIPT	1.21526	1.10693
YWHAZ	1.21525	1.22648
EPB41L4B	1.21523	1.06783
STH	1.21518	1.03083
APOBEC2	1.2151	1.05103
GRIA1	1.21492	1.09929
NYNRIN	1.2149	0.996574
IDS	1.21444	1.03374
PP2D1	1.21432	0.937054
PLA2G4B	1.21427	1.03289
MS4A10	1.21423	1.05721
PIR	1.21422	1.13952
ABLIM1	1.21408	0.906475
LRRC16A	1.21406	0.944844
FAM75A2	1.21402	0.936412
STARD10	1.21396	1.08941
THG1L	1.21394	1.09113
SEMA3G	1.21392	1.02147
TFDP3	1.21385	1.1932
ZNF566	1.21383	1.01134
VCAM1	1.21375	1.1049
TMEM209	1.21359	0.96951
KRT79	1.21354	1.01816
NKPD1	1.21342	0.981158
GPR137B	1.21335	1.04348
METTL16	1.21327	0.967598
MRPS18C	1.21312	0.999315
NRBP1	1.21308	1.09215
ARRDC4	1.21299	1.09284
SLC9A7	1.21292	1.06475
HAUS2	1.21286	0.867558
FERD3L	1.21249	1.0482
MTFMT	1.21247	1.02661
PPP1R2	1.21247	0.942894
CAMK4	1.21246	0.859182
GIPR	1.21242	0.881246
KCNAB3	1.21238	0.90331
SRSF8	1.21233	0.918996
ALDH1A1	1.21212	1.05775
MYO9A	1.21198	1.00608
ISG15	1.21187	0.99595
KRT16	1.21165	1.03768
ATP4A	1.2116	1.13757
KCNU1	1.21155	1.0318
SPNS1	1.21133	1.12459
TRIT1	1.21132	1.14666
PALD1	1.21127	0.996755
SHC4	1.2111	1.05792
KLHDC8B	1.21075	0.978129
BTN2A3P	1.21069	0.935937
CHMP4B	1.21065	1.06683
METTL17	1.21065	0.976509
PATE1	1.21063	1.00137
YIPF4	1.21054	0.974889
CYLC2	1.2105	0.96814
ABO	1.21017	1.00649
LPA	1.21008	0.852044
C6orf203	1.21008	1.02471
CACNG2	1.21	0.988968
RAD18	1.20975	1.06424
KCNMB2	1.20973	1.04218
MRGPRX2	1.20949	1.09539
PHF2	1.20946	1.07333
MCHR2	1.20946	0.936405
SHC3	1.20938	1.10207
ZBTB25	1.20937	1.12596
ZNF510	1.20933	1.05892
SMOX	1.2093	0.940947
UBFD1	1.20911	0.969218
TYMP	1.20888	1.08546
SEMA3C	1.20879	0.892669
CHD1L	1.20869	0.888384
IL31RA	1.20868	1.12265
UBE2R2	1.20862	0.937054
MAOA	1.2086	1.07852
GPT2	1.20852	0.892927
RNH1	1.20844	1.02268
BHMT2	1.20831	0.946139
TMEM86B	1.2082	0.947752
OAS3	1.20816	0.950681
PRUNE	1.20812	0.891454
C22orf42	1.2079	1.02997
CCDC67	1.20777	0.925881
FOPNL	1.20776	1.01985
ZNF544	1.20749	1.07982
PPME1	1.20748	1.04413
RAB2A	1.20747	1.14147
C10orf67	1.20743	1.1223
TTK	1.20741	1.02206
ZNF610	1.20722	0.896197
FRAT1	1.20712	1.25243
DUSP15	1.20705	1.00909
PRKD1	1.20699	1.03569
LPPR1	1.20694	1.06156
FAM71F1	1.20684	1.02124
PIP4K2C	1.20683	0.991564
UNC13A	1.20674	1.09078
OR6M1	1.20665	1.02912
HSPB3	1.20637	0.932854
SLFN5	1.20633	1.0584
ZDHHC23	1.20618	0.99863
AGER	1.20607	1.06749
GPRIN1	1.20605	1.00932
ADCYAP1R1	1.20594	0.970149
DEFB132	1.20583	1.08991
ZNF182	1.20573	1.01985
OR52K1	1.20566	0.957862
AHDC1	1.20548	1.03888
R3HDM2	1.20544	1.04577
ANKRD44	1.20541	0.961928
NUMBL	1.20519	0.98013
RAB29	1.20512	0.997404
BTBD1	1.20506	0.971223
OR6N1	1.20506	1.03563
UBOX5	1.20487	0.926671
FSHB	1.20461	1.02055
CDC42EP1	1.20453	1
CTDNEP1	1.20447	0.984584
ASCL1	1.20407	0.980532
HM13	1.20407	0.980532
TKTL2	1.20403	0.92732
NR2F2	1.20398	0.874108
WWC2	1.20383	1.06602
CPA6	1.20378	0.963011
PRR22	1.20378	0.901336
MARCH10	1.20365	0.967554
KRT20	1.20362	0.989064
ZNF385A	1.20359	0.88729
LRCH1	1.20343	0.922234
SDHAF2	1.20336	0.99271
CRH	1.20335	1.22972
DVL2	1.20329	1.16615
ARFGAP3	1.20327	0.981181
TFE3	1.20314	0.985724
DHDDS	1.203	0.905905
PPP2R2B	1.20299	1.04802
SLC5A2	1.20291	1.09599
FCGR1B	1.20288	1.04008
HDAC1	1.20279	0.941596
PPM1G	1.20274	1.11486
PEX5L	1.20267	1.04131
ZNF772	1.2025	0.90077
CDIPT	1.20235	0.986372
LILRA1	1.20224	1.08325
EFNB3	1.20223	0.990915
RINT1	1.20223	1.03483
GJA10	1.20217	1.1207
PPM1D	1.20209	0.937703
PLK2	1.20192	0.973394
PCDH1	1.20191	1.07708
CD58	1.20183	1.08667
ZC3HC1	1.20175	0.99919
FAM98A	1.20174	1.04212
COPZ2	1.20167	0.947752
IRF3	1.2016	0.955873
CA5A	1.20156	0.982179
BIN2	1.20152	0.953017
TIMM13	1.2015	0.965057
TPSAB1	1.2015	0.959903
ECSIT	1.20149	1.13163
OR8D1	1.20135	1.10085
FCGR3A	1.20132	1.14731
ARHGEF2	1.20126	0.938352
OTP	1.20125	0.900651
N4BP3	1.20118	1.12677
GPR34	1.20105	1.09864
CDKN2B	1.20086	1.07657
RFX1	1.20079	0.925373
LYN	1.20076	1.04997
FCRLB	1.20054	0.99676
MFAP3	1.20046	0.968482
USF1	1.20043	0.970149
MFSD9	1.20041	1.00203
PCK2	1.20033	1.03699
FGFBP3	1.19985	1.0644
RNF213	1.19979	1.02855
TMEM242	1.19976	0.832321
PRNT	1.19972	0.964763
SCFD2	1.1997	0.967797
USP40	1.19969	1.0331
SEPP1	1.19956	0.987324
WDR64	1.19955	1.01134
MYOT	1.19955	0.885784
SAMHD1	1.19943	0.870393
SLC2A4	1.19941	1.07787
CASD1	1.19937	0.948735
USP3	1.19933	0.917586
ANAPC16	1.19921	1.09764
TPRG1	1.1992	1.00648
LOC150786	1.19911	1.05242
NCK1	1.19899	0.931213
ABHD13	1.19898	0.927501
CNTN1	1.19872	0.97599
OR4D9	1.19864	0.871531
PLB1	1.19862	0.980532
COX5A	1.19854	1.05191
ABCA4	1.19841	1.09215
TLK1	1.1983	0.891629
KPTN	1.19823	0.959918
MUM1	1.19814	1.00274
EMR4P	1.19801	1.00779
LRTM1	1.19792	0.90077
OR10R2	1.19774	1.03289
RNF148	1.19772	0.985724
LOH12CR1	1.19755	1.04577
FGF23	1.19753	0.959117
LENG9	1.19744	1.0137
LAGE3	1.19743	1.14581
PRKCA	1.19733	1.00389
ABHD4	1.19732	0.932511
GABRA5	1.19707	1.0889
SLC29A3	1.19706	1.05321
WBSCR17	1.19703	0.98183
C3orf14	1.19698	0.829081
LCN12	1.19666	0.888384
EMCN	1.19665	1.00788
SUMO3	1.19663	1.03255
PIGB	1.19659	1.04023
FBXW7	1.19656	0.892927
PCDH11X	1.19654	0.936622
PTGER3	1.19647	1.00909
MDH1	1.19643	0.973394
ACTG2	1.19634	0.862292
C7orf62	1.19623	1.03289
APCDD1	1.1961	0.961631
LAMC2	1.19602	1.08505
FAM78B	1.19599	0.978129
PKDREJ	1.19593	1.03634
OAZ1	1.19581	1.08112
OR4C46	1.19574	0.91778
OR8D2	1.19569	0.881466
NEK4	1.19566	0.933809
GGT1	1.19558	0.963344
MBD4	1.19557	0.938352
GNPTG	1.19555	1.07857
MPL	1.1955	1.05905
USP46	1.19541	0.86697
AGO2	1.1954	1.10383
PALM2	1.1954	1.10243
BCL2L14	1.19538	0.947437
KLF17	1.19515	1.09275
RNF175	1.19501	0.925373
SIKE1	1.19497	1.00486
TGS1	1.19493	1.01038
PUS1	1.19476	0.949777
ALPI	1.19475	0.979234
NDUFB10	1.19475	0.979234
PORCN	1.19465	0.943543
MYO5B	1.19456	0.948086
CCDC107	1.19455	0.960308
KCNC2	1.19446	1.07787
RGS11	1.19442	0.949983
MURC	1.19424	1.0853
NEK2	1.19418	0.926022
FAM175A	1.19409	1.07817
MSTO1	1.19404	0.986634
TMEM126A	1.19397	1.05063
MFN2	1.19371	0.993511
TMPRSS13	1.19369	1.16807
AGBL1	1.19353	1.17375
CCDC43	1.19352	1.07695
MSH3	1.19344	1.09669
CACNA2D1	1.19309	0.985075
POLD3	1.19309	1.02985
CLINT1	1.19308	1.01337
CEND1	1.19305	1.00648
TSEN15	1.19304	1.07468
SYNGAP1	1.19303	1.02552
FBXO48	1.19294	1.03894
APPL2	1.1929	1.15188
IFLTD1	1.19277	0.958283
NHP2L1	1.19267	1.06201
OR5W2	1.1926	0.991778
SLC26A9	1.19258	1.06165
PLA2G12A	1.1924	1.12005
IER5	1.19219	0.99863
PJA2	1.19208	0.999351
EMID1	1.192	0.923261
FMR1	1.192	0.99352
ACAA1	1.19196	1.00567
RBL2	1.19195	0.815704
AKAP4	1.1918	1.01752
SYT5	1.19176	1.08496
RCBTB2	1.19171	1.0405
LIPG	1.19171	0.952207
GZMH	1.19171	1.1207
CDC42SE2	1.19159	1.03115
GPBP1L1	1.19146	0.987039
PLEKHH2	1.19134	1.05468
NMNAT2	1.19131	1
GPR174	1.1913	0.950681
IARS	1.19113	0.910448
KRT26	1.19113	0.926691
C5	1.19088	1.04796
GRPEL1	1.19075	1.01679
ACADM	1.19068	0.834523
MTSS1	1.19052	1.06783
ANKRD55	1.19049	0.764277
AVPR1B	1.19042	0.955873
LSM14B	1.19036	1.01742
HEPN1	1.19028	0.984584
ECE2	1.19015	0.974043
NKX2-5	1.19009	1.03245
PAPSS1	1.19004	1.09085
PFN3	1.19	1.03159
PRKACB	1.18985	1.05062
MYH8	1.18981	0.942894
PIPOX	1.18975	1.11356
IFIT1B	1.18975	0.939363
ZNF444	1.18963	1.01644
CDC25B	1.18961	0.844257
STEAP3	1.18931	0.920831
LY96	1.1893	0.98801
FAM153B	1.1893	0.960603
PASK	1.18918	0.871512
VASN	1.18917	1.09478
SLC5A3	1.18917	0.978534
KCNA2	1.18911	1.05127
GPR22	1.18904	0.822193
UTY	1.18894	0.980473
COX18	1.18891	1.12799
BBS4	1.18886	0.933539
AVEN	1.18876	1.02012
C10orf90	1.18875	1.0185
SYNPO2L	1.18874	1.0394
KCTD4	1.18851	0.979883
B3GNT8	1.18845	0.984426
RSL1D1	1.18833	1.01742
CD40	1.1883	0.872161
CDK5RAP2	1.18823	1.04899
RASA2	1.18823	0.93965
LILRA6	1.18818	0.967193
F11	1.18812	1.07463
GALR2	1.18812	1.01168
C9orf3	1.18799	0.894873
ATP7A	1.18798	1.1512
ACSM3	1.18794	0.962362
NEIL3	1.18792	1.06886
OSMR	1.18789	0.966905
MMGT1	1.18752	1.13973
CRIP2	1.18739	0.964358
RHOBTB3	1.18712	1.10253
C1orf27	1.18696	0.959498
TPGS2	1.18692	1.06035
BAIAP2L1	1.18685	1.09518
TMEM18	1.18683	0.961288
PPAP2C	1.18682	1.0623
ADAM19	1.18673	1.07138
CC2D2A	1.18661	0.994176
MAGEA11	1.18657	1.00206
RCAN2	1.18651	0.894827
CLPTM1L	1.18647	1.03119
UBE2L3	1.18642	1.10318
ARHGEF15	1.18641	0.976019
MMP23B	1.18634	1.0716
DNTTIP1	1.18625	0.972745
TRIM10	1.18609	1.13952
GRIN2B	1.18606	1.06749
BAG2	1.1857	1.02726
BEND5	1.18558	1.1456
CD248	1.18551	1.06683
HAT1	1.18545	1.05451
OGDHL	1.18526	1.07722
KREMEN1	1.18511	1.08188
C6orf10	1.18507	1.00856
C8orf22	1.18505	0.94964
SLC6A9	1.18504	0.93316
FAM49A	1.18488	1.07088
DNLZ	1.18463	0.972251
KCNE3	1.18443	1.0013
TMEM174	1.1844	1.1288
VRK3	1.18438	0.915639
LOC389834	1.18431	1.04591
SORBS2	1.18429	1.05225
ZNF408	1.18428	1.06166
OTUD6A	1.18425	1.07493
FAM65C	1.18421	1.06304
CCT2	1.18419	0.935601
WWC1	1.18418	1.10288
EID2	1.18417	1.0331
KCNN4	1.1841	1.04218
FSIP1	1.18395	0.962316
APLNR	1.18395	0.965607
TLN2	1.18385	0.979445
CDC37	1.18385	1.07007
B4GALNT1	1.1837	1.09669
TRIM74	1.18358	1.11486
TAS2R13	1.18351	0.932511
TCEAL6	1.18348	1.05994
GAD2	1.18326	1.02876
DTWD2	1.18322	1.03402
GPR20	1.18318	1.07008
AMIGO3	1.18318	1.0233
ILKAP	1.18315	1.07463
ACADSB	1.18312	1.07917
CD8A	1.1831	1.03255
ZMYND8	1.183	1.09734
CALCRL	1.18296	0.993511
MMP15	1.18296	0.993511
CCT6A	1.18289	1.11551
PCDH11Y	1.18267	0.893799
WBP1	1.18251	0.912299
SUV420H1	1.18239	0.962362
DCAF11	1.18231	0.829736
FUCA2	1.18222	1.11162
RFNG	1.18208	1.01233
BROX	1.18207	1.02106
TCEB3B	1.18197	1.0305
RPGRIP1L	1.18187	1.05265
SPOPL	1.18184	0.932511
C11orf74	1.18184	1.05792
KIR3DX1	1.18164	0.937627
PRR5	1.18164	0.937627
ATP12A	1.18154	1.11226
ITGA2B	1.18152	0.976639
OFD1	1.18152	0.976639
USP15	1.18144	0.990266
MMP3	1.18135	0.863725
HVCN1	1.18132	1.15769
GABRA4	1.18125	1.02661
HDAC8	1.18118	1.04023
GSTO1	1.18105	1.06749
CLRN1	1.18104	1.00972
CACNA2D3	1.18101	1.07657
VAPB	1.181	1.02124
LCE1C	1.18099	0.941076
C2	1.18098	0.92732
ACO1	1.18096	0.931862
HES7	1.18091	0.940947
DCC	1.18084	0.929526
TSC22D3	1.18083	0.990684
GIT1	1.18079	1.06612
LCE1B	1.18076	1.09901
FAM120B	1.1807	0.922641
NIPAL1	1.18066	0.899959
KIAA1755	1.18065	0.99433
TACR1	1.18054	1.01817
SYNE3	1.18049	1.0322
FN1	1.18033	0.891629
PARS2	1.18032	1.09599
XRCC4	1.18032	0.929931
ARID5B	1.18029	0.901985
CCDC62	1.18022	0.984204
NDUFB5	1.18012	0.937054
EVC	1.18002	0.96026
EPB41L4A	1.17997	1.14702
BLNK	1.17995	1.06029
LACC1	1.17994	1.04739
FAM124B	1.17992	1.01418
C4orf3	1.17991	1.05265
MAST3	1.17988	0.996106
SPINT2	1.17987	0.953017
CSF3R	1.17981	1.01428
RAPSN	1.17979	1.01882
PPAPDC3	1.17965	0.846853
C1QC	1.1796	1.0162
TGIF2LY	1.17947	1.11421
NUP210L	1.17947	0.970838
ABCA7	1.17945	0.89682
TSPYL1	1.17943	0.947585
HIST1H3J	1.17938	0.956835
MAFF	1.17935	0.924075
P2RY1	1.17933	0.928618
PPBP	1.17932	0.93316
SLA2	1.17929	1.00034
KIAA0226L	1.17927	0.892429
POLR2L	1.17912	0.992213
CLDN18	1.17908	0.996574
OTUD5	1.17905	0.963686
TMEM9B	1.17899	1.05873
LOC100132832	1.17877	1.02843
RNF115	1.17875	1.12849
FRMD1	1.17869	0.962658
CD244	1.17869	0.908465
ADAMTS9	1.17842	0.965607
TIGIT	1.17838	1.06278
PRRT1	1.17833	1.0243
ZFP90	1.17829	1.02227
GMPR2	1.17826	0.99109
FNDC3A	1.17822	1.00689
KRT15	1.17811	1.0949
LIFR	1.1781	1.11551
PGBD2	1.17805	0.890716
ERICH3	1.17802	1.09113
MXRA5	1.17799	0.972053
ITSN1	1.17799	0.994861
ZNF410	1.1777	1.02835
ABI3	1.1776	0.891059
SLC38A4	1.17753	1.02531
GOLGA2P5	1.17741	0.848117
GCOM1	1.17725	1.11462
PRR25	1.17717	0.952038
AQP11	1.17702	1.06029
SMEK2	1.17689	1.06237
RNF26	1.17682	0.989617
PPP1R16A	1.17681	0.99416
EPHB4	1.1768	1.01233
NR0B2	1.17679	1.02141
LRIT3	1.17671	1.11202
LRP5	1.1766	1.05276
PRPF4	1.17648	1.09113
ARL14	1.17647	1.03119
GSTT2B	1.17642	0.932854
TOX	1.17629	1.07811
TTC7A	1.17627	0.875253
NFX1	1.17615	1.04901
DHRS4L2	1.17609	0.948955
BMP7	1.17605	1.21285
SHPK	1.17605	0.949384
SPR	1.17605	0.985724
SUB1	1.17605	0.963011
TRIM65	1.17605	0.858533
TSN	1.17601	1.00445
GHDC	1.17599	1.06318
FAM3B	1.17587	1.1247
KRT27	1.17583	1.09842
GNRH1	1.17556	0.924289
PODN	1.17543	0.854402
STYXL1	1.17535	1.09994
FEM1B	1.17534	1.07722
SMARCAL1	1.17531	1.03634
MCM9	1.17525	1.07614
MUS81	1.17524	0.950032
GYPA	1.17523	1.0077
HSPH1	1.17522	0.918235
ITGB8	1.17519	0.886437
CYP3A7	1.17512	1.07126
FAM83A	1.17508	1.0324
KIAA2018	1.17499	0.964371
MIA3	1.17481	1.00548
TAC1	1.17475	0.988352
LMLN	1.17451	0.996106
ALPPL2	1.1745	0.987021
ALLC	1.17443	0.941596
ATF6	1.1744	0.927969
OLFM4	1.17434	1.05589
LRRC43	1.17423	0.991435
TCHP	1.17404	1.05792
CAPS	1.17399	1.06304
RAB22A	1.17395	1.09215
SCMH1	1.17394	1.08761
EID1	1.17394	0.989469
GALR1	1.17362	0.942245
MFSD2B	1.17359	0.940391
ANXA6	1.17353	1.02673
MFSD7	1.17352	1.02147
ANP32C	1.17349	0.904762
ATP11A	1.17334	0.846853
PGPEP1	1.17326	1.09734
ASB11	1.17317	1.061
IFNG	1.17308	1.0292
ARHGAP15	1.17303	0.934224
UBA6	1.17303	1.01103
RPS6KA6	1.1729	0.970149
ANK3	1.17285	0.956522
NDUFA13	1.1728	0.983394
OR11H1	1.17277	1.10517
SNX25	1.17268	1.11017
MBLAC1	1.17265	1.06954
RPP25L	1.17265	1.06954
CDH22	1.17263	1.00206
ZNF135	1.17261	0.992806
EMILIN1	1.17261	0.963686
ITPA	1.17259	1.10253
RAB8B	1.17243	1.07169
SERPINF2	1.17206	0.91778
BRI3	1.17197	0.92977
LIMS2	1.17195	0.900651
NBR1	1.17194	1.0563
FAM84A	1.1718	1.05994
FZD8	1.17172	1.05775
CRYBA1	1.1717	1.03597
UBP1	1.17165	1.05721
MYO1F	1.17159	1.03871
ERMARD	1.17149	0.951353
TMEM184A	1.17149	0.951353
C2orf15	1.17149	1.0567
FKSG2_pseudogene	1.17146	1.0322
CYP11B1	1.17142	0.989617
SPATA31E1	1.17141	0.963344
TOX4	1.17137	0.989874
ZNF287	1.17126	1.08804
ZNHIT6	1.17122	1.02876
RAB3IL1	1.17119	0.918465
BCAT1	1.17118	0.982989
PROX1	1.17107	0.766385
ANKRD20A1	1.17104	1.02187
ABCF3	1.17104	0.761843
ZNF683	1.17097	0.970838
PAX1	1.17091	1.04023
THAP11	1.1709	0.955807
EMC1	1.17076	0.949298
SARS2	1.1707	0.999351
JPH4	1.17062	0.932169
TCEAL2	1.17061	0.837181
HSPD1	1.1706	0.981181
C11orf72_pseudogene	1.17054	1.04698
ORAI1	1.1705	0.963011
PTP4A3	1.17045	1.09085
KATNA1	1.17042	0.949384
OR2T10	1.1704	1.0716
SCNN1A	1.17038	1.07722
OR2L3	1.17038	0.95889
DCAF10	1.17037	0.920211
RUSC1-AS1	1.17035	1.0401
LRRC4	1.17031	1.02261
STX1B	1.17031	1.0636
ACYP1	1.17023	1.04997
CHDC2	1.1701	1.10733
C5AR1	1.17008	0.894873
PPP4R1	1.17005	1.01817
KCNMB4	1.17003	1.14147
SLC7A14	1.17001	1.09318
HDHD2	1.16991	0.816525
TPT1	1.16961	1.05242
ALDH4A1	1.16959	0.94549
MAB21L3	1.16951	1.02673
FAM151A	1.16951	1.13082
PLCXD1	1.16948	1.04607
LOC553158	1.16939	0.876873
ZCCHC13	1.16937	0.950992
PPP6R3	1.16925	1.03402
GPR111	1.16923	0.895522
IRX6	1.16904	1.05824
HDGFRP2	1.16902	1.07128
TNFSF8	1.16884	0.913669
CACNA1C	1.16876	1.04672
MAP4K4	1.16872	0.937054
DIDO1	1.16871	0.836776
C5orf15	1.16871	0.96026
POLR3D	1.16866	1.0331
PDX1	1.16865	1.01337
KCNJ9	1.16859	1.02401
PECR	1.16856	1.01947
CLN5	1.16846	1.0322
TNFAIP6	1.16842	0.989723
LRRC70	1.16837	0.991093
PCDH8	1.16832	0.992463
SPAG17	1.16813	1.02795
ZNF782	1.16793	0.708384
PSTK	1.16789	1.0292
PLEKHO2	1.16788	0.952207
CATSPER1	1.16774	1.19403
LRBA	1.16769	0.943816
MBNL3	1.16769	0.943816
LMF1	1.16768	0.848117
DLX2	1.16763	0.997404
XRCC1	1.16762	0.905905
NRSN1	1.16755	0.993115
SLC22A11	1.16755	1.032
WDR63	1.16754	1.07088
METTL23	1.16746	1.01713
SYN3	1.16742	0.995889
BNIP2	1.16741	0.883193
DYSF	1.16726	0.944159
TXNIP	1.16726	1.11179
GTF3C2	1.16719	1.03439
PABPC4	1.16714	0.906845
TPK1	1.16695	1.00714
FRMD8	1.1669	1.11339
TBCD	1.16688	0.89791
ITGA4	1.16687	0.998053
EFHC2	1.16683	1.02025
MB21D1	1.16681	1.0137
C4orf29	1.16676	1.17416
FRMD5	1.16669	0.931956
KCNQ3	1.16668	0.815055
INCA1	1.16668	0.983213
C12orf76	1.16663	0.927372
DMRTC1B	1.16653	0.872902
EBI3	1.1665	0.879299
PSMD10	1.16646	0.978129
HIATL1	1.16628	0.942892
SLIT3	1.1662	1.00891
TRIM47	1.16599	1.06295
DUSP10	1.16595	0.907203
ELP4	1.1658	0.950668
HYDIN	1.16573	0.98801
STX1A	1.16568	0.884974
ZNF154	1.16542	0.855087
CHGB	1.16538	0.951011
LGI1	1.16532	1.0483
ETV6	1.16529	1.20571
SIPA1L1	1.16525	0.931141
NANOS2	1.16524	0.986229
GTPBP8	1.16523	1.00041
LYZ	1.1652	1.19663
KCTD2	1.16508	1.183
GZMM	1.16498	0.931551
MAGEF1	1.16494	0.988254
CHRM1	1.16479	0.949384
PTAFR	1.16478	0.880597
PLA2G4A	1.16475	1.01363
AMPD1	1.16448	0.889429
L3MBTL3	1.16447	0.931956
EVA1A	1.16446	1.01701
CRELD1	1.16435	1.03483
PHLPP2	1.16428	0.972745
C6orf1	1.16422	0.939247
UBE2W	1.16422	1.03245
CRIP3	1.16413	1.09883
ZDHHC4	1.16408	1.04008
SPEM1	1.16408	1.09356
SEZ6L	1.16406	1.02268
DNAH9	1.16401	1.01747
NECAB3	1.16401	0.930798
HTR4	1.16394	0.94549
CAPN15	1.16388	0.940947
CBX7	1.16386	1.06489
TADA1	1.16386	0.964358
C20orf96	1.1638	0.94964
CCT6B	1.16379	0.996106
FBXL18	1.16367	0.987021
ZNF22	1.16367	0.9284
TRAPPC3	1.16359	0.993834
SMIM8	1.16354	0.90716
RBM12B	1.16346	0.99838
FAM213B	1.16332	0.922236
SULT1A3	1.16326	0.895522
TRRAP	1.1632	0.950681
CACNA1I	1.16315	1.00584
IQSEC2	1.1631	0.99514
ANXA13	1.16309	1.03563
ABCD2	1.16309	1.0013
ECHDC1	1.16304	0.989874
ASMTL	1.16289	0.927969
AVPR2	1.16279	0.863725
CEP76	1.16279	0.982989
ARMC3	1.16279	1.05751
LECT1	1.16277	0.930456
HSP90AA1	1.16276	0.918884
HSP90B1	1.1626	0.964958
CISD2	1.16254	1.01337
ASB6	1.16252	1.01557
FAM50A	1.16251	0.961928
FOXG1	1.1625	1.07073
MYT1L	1.1625	1.07073
SPTSSB	1.16244	0.966769
NR1D2	1.16243	1.12135
BCO2	1.16242	0.896171
SYT8	1.1624	1.03357
TAS2R20	1.16236	1.09518
TRIM58	1.16226	1.16288
DNAJC9	1.1622	0.94827
GLIPR1L2	1.16219	1.01013
G2E3	1.16215	1.04348
C15orf54	1.16213	1.0298
IGSF8	1.16213	1.04317
LY6G5B	1.1621	1.00445
STRA6	1.16201	0.985419
CD28	1.16201	1.00851
ZWILCH	1.16196	0.92977
C15orf26	1.16186	1.09032
C7orf55	1.16183	0.840356
USP43	1.16168	0.956522
FAM60A	1.16168	0.973269
CHST10	1.16168	1.0623
ACTBL2	1.16166	1.09761
PLCL1	1.16162	0.740428
CA5B	1.16158	0.89682
FOXQ1	1.16151	1.01165
SCN3B	1.16145	0.993511
FAM168A	1.16145	0.946214
PAFAH1B1	1.16143	1.09072
SERTAD4	1.16127	1.07468
SMAD9	1.16126	0.929267
INPP5E	1.16123	1.0305
TOP1	1.16123	0.772875
MYL12B	1.16123	1.07605
STAC	1.1612	0.918591
PROSC	1.16115	0.904415
CNOT10	1.16115	0.942446
TEX33	1.16109	1.08748
FXR1	1.16102	1.04282
LBX1	1.16097	0.961713
NT5C3A	1.16097	1.11356
TSHR	1.16097	1.01233
IL4R	1.16092	1.03078
HMG20A	1.1609	1.0584
SEC61A1	1.1609	0.992121
PDE3A	1.1609	1.00779
PLSCR5	1.16083	1.08951
WNT16	1.16082	0.953409
SLC35A5	1.1608	1.20117
TST	1.16075	0.948086
PEBP4	1.16071	1.03807
LASP1	1.16068	0.972251
OGFOD2	1.16064	1.00081
FOLR4	1.16061	0.977724
HIST1H1T	1.16058	0.954638
FPGT	1.16045	0.99919
ASRGL1	1.1604	0.985014
ATXN7L1	1.16022	0.942487
NDST4	1.16019	1.05905
CUBN	1.16018	0.865672
KRTAP10-7	1.16014	1.05103
FOXE1	1.16013	0.815055
ESRRA	1.16009	0.99595
FBN1	1.16006	0.994176
CDY	1.15998	0.902661
NSUN2	1.15994	1.01302
ABCB10	1.15993	0.853787
MOB3C	1.15993	1.02775
SPIDR	1.15981	1.03888
WDR54	1.1597	1.00162
UCMA	1.15966	1.01944
PGBD1	1.15958	0.86742
F2RL1	1.15956	0.972096
NOX3	1.15956	0.972096
TUBB2A	1.15956	1.01817
LRP6	1.15948	0.92148
PDZD11	1.15947	1.02673
LCE6A	1.15945	0.973279
ATP6V1D	1.1594	0.963011
CDH6	1.15939	0.946557
MGME1	1.15935	0.947927
ZNF226	1.15935	0.947927
BAIAP2	1.15925	0.953926
RGS21	1.1592	0.938678
CHRNB3	1.15904	1.03245
RBMY1A1	1.15902	1.15176
GADD45GIP1	1.15894	1.02193
ARHGAP31	1.15887	1.0394
CDH3	1.1588	1.13189
TMIGD2	1.15879	0.795869
OR5B12	1.15867	1.06235
ZBTB49	1.15855	1.02227
SH2B3	1.15852	1.07209
CCDC64	1.15845	1.0401
SRGAP2	1.15844	1.07194
TEX2	1.15844	1.05792
ATP8A2	1.15839	1.16677
C5orf24	1.15835	1.05265
C17orf74	1.15832	0.801539
ZNF493	1.15832	0.940733
FSCN1	1.1583	1.15382
CRY2	1.15829	1.07463
FAM71A	1.15827	1.03848
GLA	1.15826	0.987021
OGN	1.1582	1.00648
MCAM	1.15818	1.04212
SERPINA7	1.15818	1.15315
TP53INP1	1.1579	1.06441
AMPD2	1.15784	1.00584
FRMD7	1.15782	1.06561
KIF2A	1.15774	1.16742
ZC3H6	1.15773	1.09599
METTL12	1.15765	0.934567
SYNDIG1	1.1576	1.09284
NOX4	1.15751	0.853787
ZNF766	1.15745	1.00891
CCDC102B	1.15745	1
IPO4	1.15744	1.05276
PALM	1.15737	0.929428
RAI1	1.15737	0.992463
TCEB3	1.15736	1.06165
H2AFZ	1.15731	0.995204
HHLA3	1.15717	1.01094
GUCY2EP	1.15717	1.17262
GTF2H2C_2	1.15709	1.05173
OPRK1	1.15703	1.04348
UQCR11	1.157	1.00195
GALNT18	1.15695	1.03894
CYB5B	1.15688	0.99514
GRWD1	1.15675	1.0507
ZNF112	1.15674	1.0185
L1TD1	1.15656	0.877683
ARHGAP8	1.15651	0.937703
DSCAML1	1.15649	0.947585
ATP9B	1.15647	0.974692
IFI27L1	1.15628	0.939705
SAAL1	1.15625	0.888619
ZNF107	1.15616	1.01539
GYS1	1.15615	1.15055
FAM110C	1.15613	0.929085
C11orf54	1.1561	0.979749
CCDC141	1.15597	1.01918
PBDC1	1.15595	1.07023
OR51S1	1.15593	1.02055
C16orf58	1.15591	0.978129
ANKEF1	1.15584	1.09539
CTSF	1.15583	0.905905
ERO1L	1.15583	0.905905
SNAI1	1.15577	1.14783
XKRY2	1.15571	0.996574
TPP2	1.15568	1.04932
C9orf96	1.15567	1.08631
ZNF560	1.15562	0.865022
EPYC	1.15557	1.04091
HIST1H2AB	1.15542	1.02638
TACR3	1.1553	0.846204
ATP4B	1.15529	0.772226
C3orf52	1.15528	1.07331
MANBAL	1.15526	1.0644
INIP	1.15523	1.08702
P2RX6	1.15515	1.05905
AGPS	1.15508	1.12849
PALB2	1.15508	0.953827
APOBEC3D	1.15503	0.980532
PZP	1.15498	1.01199
KLC2	1.15498	1.08188
TINAG	1.15478	1.04088
INPP1	1.15465	1.10578
TNPO3	1.15464	0.992121
FUT10	1.15427	1.02957
TECPR1	1.15425	0.956149
MAS1L	1.15422	0.944192
GRM8	1.15416	1.04607
CYP2S1	1.15397	1.03699
YWHAB	1.15395	0.992305
CCDC30	1.15383	1.03049
PABPC3	1.15374	1.0346
ECEL1	1.15371	0.990915
SLC45A2	1.15364	1.12313
KLHL11	1.15362	1.00377
IVD	1.15357	1.10531
PRUNE2	1.15357	0.946132
C17orf75	1.15348	1.01418
RNF138	1.15347	1.01428
KREMEN2	1.15346	0.912395
DLG1	1.15344	1.04672
CYP2U1	1.15343	0.944841
AHSA2	1.15328	1.07674
ASPN	1.15328	0.948157
TRPS1	1.1532	1.10253
CPA5	1.15317	1.00065
MBD5	1.15315	1.08424
DYRK1B	1.15313	1.06554
OXCT2	1.153	0.971648
CHST3	1.15299	0.950182
OLFML3	1.15289	0.943816
TFAP2D	1.15276	0.917586
OR52A4_pseudogene	1.15275	1.00856
FAM75A3	1.15269	1.09721
IFITM2	1.15266	0.998785
PTPDC1	1.15242	1.03374
SACM1L	1.15242	1.03374
PCGF5	1.15242	1.0013
CCNA2	1.15241	0.936405
EXOSC10	1.15231	0.996755
STOML2	1.1523	1.01165
DOCK1	1.1523	1.03186
PFDN6	1.15219	0.931146
OCLN	1.15212	0.797534
KDM4D	1.15209	1.02261
INTS12	1.15209	0.98767
ZNF670	1.15208	0.879303
URI1	1.15197	0.968825
MCF2L2	1.15185	0.946139
DIRC2	1.15179	1.05927
CSNK1G3	1.15173	0.941596
BRS3	1.1517	1.03439
SMYD5	1.1517	1.03439
STMN4	1.15168	0.921891
LLGL2	1.15165	0.923261
SPTBN4	1.15162	0.986639
ICAM5	1.15161	0.884207
CYP7A1	1.15153	0.964958
PDE4D	1.15136	0.971243
C10orf111	1.15135	0.98013
OR4D1	1.15131	1.04488
OSGEP	1.1513	1.04867
COX8C	1.15128	1.04658
WDR20	1.15125	0.940867
ATP10A	1.15119	1.04413
[truncated: 16,057 more rows]
