# Supplementary material for: Functional analysis across model systems implicates ribosomal proteins in growth and proliferation defects associated with hypoplastic left heart syndrome
Source: eLife. 2025 Dec 11;14:RP106231. doi: 10.7554/eLife.106231 (PMC12698088; doi:10.7554/eLife.106231)
Supplement: Supplementary file 2. — MOI – mode of inheritance. [file elife-106231-supp2.xlsx]

## Sheet: All candidate genes
Proband	Gene	MOI	Gene Alias
323H	ACAP2	De Novo
87H	ACTR6	Cmpd Het
314H	AIFM1	Xlinked
145H	AJUBA	Cmpd Het
68H	AKAP9	Cmpd Het
87H	AMMECR1	Xlinked
205H	AMOTL2	Cmpd Het
49H	ANKRD50	Cmpd Het
87H	APOO	Xlinked
219H	ARHGAP26	Cmpd Het
48H	ARHGAP31	Cmpd Het
151H	ARHGEF6	Xlinked
49H	ARHGEF9	Xlinked
49H	ARID1B	De Novo
314H	ARSD	Xlinked
72H	ATM	Cmpd Het
249H	ATP11C	Xlinked
87H	ATP13A1	Cmpd Het
314H	B4GALT2	Cmpd Het
197H	BAG6	Cmpd Het
68H	BCAP31	Xlinked
219H	BECN1	De Novo
56H	BPHL	Hom Rec
151H	C1GALT1C1	Xlinked
314H	C7orf55-LUC7L2	Hom Rec
108H	CAMSAP1	Cmpd Het
74H	CAND2	Cmpd Het
201H	CAPN6	Xlinked
197H	CCDC8	Hom Rec
197H	CDKN1A	Cmpd Het
87H	CELSR1	Cmpd Het
201H	CENPI	Xlinked
325H	CIPC	De Novo	KIAA1737
323H	CLDND1	Cmpd Het
96H	CLIC1	Cmpd Het
201H	CLTA	De Novo
250H	CMTM3	De Novo
146H	COL4A5	Xlinked
68H	COL4A5	Xlinked
201H	COL4A6	Xlinked
48H	COL6A3	Cmpd Het
314H	COL6A3	Cmpd Het
219H	COL6A6	Cmpd Het
96H	COX18	Cmpd Het
15H	CTBP2	Cmpd Het
96H	CTC1	Hom Rec
219H	CTDSP1	Cmpd Het
151H	CTPS2	Xlinked
207H	CTSL	Cmpd Het
108H	CTSZ	Cmpd Het
48H	CUL7	Cmpd Het
68H	CUL7	Cmpd Het
250H	CYHR1	Cmpd Het
323H	CYTH1	Cmpd Het
48H	DAP3	Cmpd Het
15H	DAP3	Cmpd Het
96H	DCTN1	De Novo
15H	DDAH1	Cmpd Het
76H	DDX3X	Xlinked
205H	DIDO1	Cmpd Het
267H	DKC1	Xlinked
68H	DMD	Xlinked
207H	DMD	Xlinked
68H	DNAJB1	Cmpd Het
207H	DNAJB4	Cmpd Het
68H	DNHD1	De Novo
96H	DOCK6	Cmpd Het
219H	DOCK9	Cmpd Het
15H	DPP9	Cmpd Het
249H	DPYSL3	Cmpd Het
267H	DST	Cmpd Het
197H	DTNA	Cmpd Het
151H	ELF1	Cmpd Het
56H	ELP1	Cmpd Het	IKBKAP
323H	EPHA4	Cmpd Het
108H	EZR	Cmpd Het
219H	FAM129A	Cmpd Het
207H	FAM50A	Xlinked
68H	FAM98B	De Novo
323H	FAT4	Cmpd Het
151H	FAT4	Cmpd Het
205H	FBXO11	Cmpd Het
49H	FGF13	Xlinked
197H	FGGY	Cmpd Het
250H	FHL1	Xlinked
49H	FLNA	Xlinked
48H	FLNA	Xlinked
314H	FLNA	Xlinked
250H	GBF1	Cmpd Het
146H	GLYR1	Cmpd Het
96H	GNL3L	Xlinked
197H	GOLGA3	Cmpd Het
323H	GOT2	Cmpd Het
249H	GPC3	Xlinked
76H	GPC4	Xlinked
250H	GPRASP1	Xlinked
76H	GPSM1	Cmpd Het
250H	GRIPAP1	Xlinked
250H	GUCY1A1	Cmpd Het	GUCY1A3
87H	GYS1	Cmpd Het
146H	HDLBP	Cmpd Het
219H	HEY2	Cmpd Het
74H	HIST1H4H	Cmpd Het
249H	HMCN1	Cmpd Het
146H	HMGA1	Cmpd Het
151H	HPS4	Cmpd Het
146H	HTATSF1	Xlinked
249H	HTATSF1	Xlinked
250H	IDS	Xlinked
49H	IFIT1	Cmpd Het
72H	JMJD1C	Hom Rec
49H	JMJD1C	Cmpd Het
49H	JUP	De Novo
323H	KALRN	De Novo
76H	KDM6A	Xlinked
56H	KIAA1671	Cmpd Het
249H	KIFC1	Cmpd Het
314H	KLHL21	Cmpd Het
314H	KMT2C	Cmpd Het
325H	KMT2D	De Novo
250H	LATS2	Cmpd Het
207H	LDLRAD4	Cmpd Het
76H	LGALS3BP	Hom Rec
74H	LIMCH1	Cmpd Het
207H	LIMS1	Cmpd Het
72H	LINS1	Cmpd Het	LINS
197H	LRBA	De Novo
87H	LRBA	Cmpd Het
56H	LRRFIP2	De Novo
314H	LUC7L2	Hom Rec
205H	LUC7L2	Cmpd Het
201H	LYST	Cmpd Het
207H	MAGT1	Xlinked
151H	MAP3K15	Xlinked
15H	MAP7D3	Xlinked
145H	MARCH7	Cmpd Het
151H	MDC1	Cmpd Het
145H	MDM2	Cmpd Het
48H	MED13	Cmpd Het
151H	MED14	Xlinked
197H	MEF2C	Cmpd Het
48H	MEIS2	Cmpd Het
49H	MESDC2	De Novo	MESD
96H	MID1	Xlinked
250H	MIER1	Cmpd Het
145H	MLEC	Cmpd Het
323H	MLLT10	Cmpd Het
201H	MMRN1	Cmpd Het
267H	MPDZ	Cmpd Het
314H	MRPL47	Cmpd Het
49H	MRPL50	De Novo
249H	MSL3	Xlinked
249H	MSN	Xlinked
207H	MTCP1	Xlinked
87H	MXRA5	Xlinked
145H	MXRA5	Xlinked
151H	MXRA5	Xlinked
151H	MYADM	Cmpd Het
219H	MYBPC3	Cmpd Het
323H	MYH6	Cmpd Het
219H	MYOF	Cmpd Het
48H	MZT2B	Cmpd Het
250H	NAA10	Xlinked
314H	NBAS	Cmpd Het
250H	NEBL	Cmpd Het
145H	NEDD9	Cmpd Het
146H	NFAT5	De Novo
68H	NHSL2	Xlinked
250H	NNT	Cmpd Het
146H	NOL6	Hom Rec
74H	NOP9	Cmpd Het
108H	NPEPL1	Cmpd Het
323H	NPNT	Cmpd Het
146H	NR2F2	Cmpd Het
205H	NSUN5	Cmpd Het
72H	NUBP2	Cmpd Het
249H	NUMB	Cmpd Het
250H	NUP153	Cmpd Het
145H	NUP214	Cmpd Het
325H	OBSCN	Cmpd Het
74H	OSBP	Cmpd Het
48H	OTUD5	Xlinked
151H	OTUD5	Xlinked
49H	PCDH17	Cmpd Het
314H	PDE4D	Cmpd Het
96H	PDE4DIP	Cmpd Het
151H	PDHA1	Xlinked
314H	PGD	Cmpd Het
87H	PGK1	Xlinked
72H	PGRMC1	Xlinked
323H	PHF11	Cmpd Het
145H	PHF6	Xlinked
250H	PIEZO1	Cmpd Het
145H	PKD1	Cmpd Het
146H	PKMYT1	Cmpd Het
201H	PLEC	Cmpd Het
49H	PLXNA3	Xlinked
15H	PLXNA3	Xlinked
145H	PLXNA3	Xlinked
76H	PPAN	Cmpd Het
249H	PPID	Hom Rec
49H	PPP1CB	Cmpd Het
323H	PPP3CC	Cmpd Het
87H	PRIMPOL	Cmpd Het
49H	PRPF19	Cmpd Het
201H	PRRC2A	De Novo
68H	PRRC2C	Cmpd Het
267H	PSPH	Cmpd Het
201H	PTGER3	Cmpd Het
68H	PTK7	Cmpd Het
201H	PTPRD	Cmpd Het
49H	RAB11FIP5	Cmpd Het
207H	RAB5B	Cmpd Het
197H	RABL6	Cmpd Het
48H	RAD23A	Cmpd Het
201H	RAD50	Cmpd Het
314H	RAD51AP1	Cmpd Het
68H	RAD51C	Cmpd Het
249H	RALBP1	Cmpd Het
267H	RAN	Cmpd Het
197H	RASL11B	Cmpd Het
76H	RBFOX1	De Novo
314H	RBM24	Cmpd Het
267H	RDX	Cmpd Het
201H	RENBP	Xlinked
56H	RERE	Cmpd Het
56H	RGS3	Cmpd Het
201H	RGS3	Cmpd Het
219H	RGS5	Cmpd Het
96H	RNF103	De Novo
96H	RNH1	Cmpd Het
76H	RPL10	Xlinked
201H	RPL13A	Cmpd Het
145H	RPL26L1	Cmpd Het
145H	RPL36A	Xlinked
145H	RPL36A-HNRNPH2	Xlinked
151H	RPL39	Xlinked
96H	RPL3L	Cmpd Het
145H	RPS15	Cmpd Het
325H	RPS17	Hom Rec
76H	RPS28	Cmpd Het
146H	RTCA	Cmpd Het
250H	RTL8C	Xlinked	FAM127A
87H	RYK	Cmpd Het
151H	SBSPON	Cmpd Het
151H	SCAF11	Cmpd Het
249H	SCD	Cmpd Het
219H	SDF4	Cmpd Het
108H	SEC16A	Cmpd Het
68H	SEMA6C	Cmpd Het
49H	SENP7	De Novo
146H	SEPT2	Cmpd Het
323H	SF1	Cmpd Het
314H	SGCA	Cmpd Het
197H	SLC2A14	Cmpd Het
49H	SLC35A2	Xlinked
250H	SLC6A8	Xlinked
207H	SMS	Xlinked
72H	SPSB3	Cmpd Het
207H	SRPK3	Xlinked
314H	SRPK3	Xlinked
68H	SRRM2	Cmpd Het
201H	STARD13	Cmpd Het
15H	STT3B	Cmpd Het
201H	SULF2	Cmpd Het
74H	SUN1	Cmpd Het
219H	SYNCRIP	Cmpd Het
72H	SYNE1	Cmpd Het
15H	SYNE2	Cmpd Het
197H	SYNGR2	Cmpd Het
314H	SZT2	Cmpd Het
74H	TAF1	Xlinked
267H	TAZ	Xlinked
145H	TBC1D1	Hom Rec
207H	TBCD	Cmpd Het
325H	TFRC	Hom Rec
48H	TIA1	Cmpd Het
201H	TIMM17B	Xlinked
72H	TIMM8A	Xlinked
87H	TIMP1	Xlinked
267H	TIPARP	De Novo
151H	TKT	De Novo
15H	TMEM167A	De Novo
207H	TMEM185A	Xlinked
151H	TMEM185A	Xlinked
201H	TMSB15A	Xlinked
145H	TP53BP1	Cmpd Het
96H	TRAPPC8	Cmpd Het
87H	TRO	Xlinked
56H	TSEN54	Cmpd Het
145H	TSPAN6	Xlinked
72H	TTI1	Cmpd Het
249H	TTN	De Novo
74H	TTN	Cmpd Het
72H	TTN	Cmpd Het
207H	TTN	Cmpd Het
314H	TTN	Cmpd Het
108H	TTN	Cmpd Het
267H	TUBB6	Cmpd Het
146H	UBN1	Cmpd Het
201H	UBN2	Cmpd Het
250H	UBQLN2	Xlinked
151H	UNC13B	Cmpd Het
207H	USP11	Xlinked
76H	USP2	Cmpd Het
72H	VMA21	Xlinked
76H	VPS13B	Cmpd Het
323H	VPS26A	Cmpd Het
76H	WAPL	Cmpd Het	WAPAL
49H	WDR43	Cmpd Het
68H	WDR45	Xlinked
48H	YY1AP1	Cmpd Het
146H	ZCCHC24	Cmpd Het
151H	ZDHHC9	Xlinked
207H	ZNF185	Xlinked
49H	ZNF189	De Novo
151H	ZNF445	Cmpd Het
