# Supplementary material for: Functional analysis across model systems implicates ribosomal proteins in growth and proliferation defects associated with hypoplastic left heart syndrome
Source: eLife. 2025 Dec 11;14:RP106231. doi: 10.7554/eLife.106231 (PMC12698088; doi:10.7554/eLife.106231)
Supplement: Supplementary file 3. [file elife-106231-supp3.xlsx]

## Sheet: Sheet 1
Gene	relative hPSC-CM proliferation rate	Fly heart defect(s)
AIFM1	0.99	dilated
ARID1B	1.04	lethal_hits
CAMSAP1	1.02	lethal_hits
CAND2	0.77
CMTM3	0.77
COL6A3	0.98	no.heart, constricted
CTBP2	1.02	constricted
CTDSP1	0.86
CTSL	0.75
CYTH1	0.42
DKC1	1.02	constricted
DNAJB1	0.76	lethal_hits
DNAJB4	1.07	lethal_hits
DOCK6	1.06	constricted
DOCK9	0.96	constricted
FAM98B	0.85
GBF1	0.59
GNL3L	0.52
GPSM1	0.85
HEY2	0.86
HMCN1	1.15	dilated
HPS4	0.78
IFIT1	1	dilated
JUP	1.01	constricted
KALRN		constricted
KDM6A	1.11	dilated
KIFC1	0.83	dilated
MAP7D3		dilated
MED14	1.02	no.heart, constricted
MEF2C	1.2	dilated
MIER1	0.57
MRPL47	0.85
MRPL50	0.94	constricted
MSL3	0.73
MYBPC3	1.06	dilated
MYH6	1.07	dilated
NEBL	0.89
NOL6	1.02	ostia.bulging.out, constricted
OBSCN	0.77	dilated
PCDH17	0.97	constricted
PGD	0.32	constricted
PPP1CB	0.98	constricted
PRPF19	0.97	constricted, dilated
PRRC2C	0.84
PTK7	0.85
RABL6	0.87
RAN	0.98	constricted
RASL11B	0.87
RBM24	0.73
RERE	1.23	constricted
RPL10	0.79	constricted
RPL26L1	0.53	lethal_hits, no.heart
RPL36A	1.06	lethal_hits, no.heart
RPL36A-HNRNPH2	0.99	lethal_hits, no.heart
RPL39	0.26	lethal_hits
RPL3L	1.3	no.heart
RPS15	0.22	lethal_hits
RPS28	0.07	ostia.bulging.out
SCAF11	0.76
SCD	0.77
SEC16A	1	constricted, dilated
SF1	0.5
SRPK3	0.84
STARD13	0.71	dilated
SYNCRIP	1.04	dilated
TAF1	0.85
TIMM8A	0.85
TMEM167A	1.03	constricted, dilated
TTN	1.02	dilated, dilated
TTN	1.08	dilated, dilated
USP11	1.11	lethal_hits
USP2	1.14	lethal_hits
WDR45	0.86
YY1AP1	0.98	no.heart, constricted
