# Supplementary material for: Functional analysis across model systems implicates ribosomal proteins in growth and proliferation defects associated with hypoplastic left heart syndrome
Source: eLife. 2025 Dec 11;14:RP106231. doi: 10.7554/eLife.106231 (PMC12698088; doi:10.7554/eLife.106231)
Supplement: Supplementary file 4. [file elife-106231-supp4.xlsx]

## Sheet: Sheet1
Gene Symbol	Consequence	Variant	MAF%	CADD	TFs	% relative hiPSC-CM proliferation	Fly gene	DIOPT score(s)	Fly heart phenotype(s)
RPS15A	Regulatory	c.-95G>A	0.662		MAX; SRF; GTF2B; BRCA1; CHD2; NR2C2; ETS1; YY1; RXRA; HEY1; POLR2A; SIN3A; MYC; E2F1; E2F4; ZNF143; EGR1; ZNF263; TBP; SETDB1; STAT1; PAX5; ZBTB33; GTF2F1; POU2F2; NFKB1; FOSL2; REST; ELF1; Hltf; SP1; IRF1; BCL3; TAF7; TAF1	0.13	RpS15Aa, RpS15Ab	11; 11	no/partial heart
WDR33	Missense	p.Y280C	0.518	21	N/A	0.78	CG1109	8	constricted, reduced contractility
NADK2	Regulatory	c.300+371C>G	0.708		POLR2A	0.84	CG8080	9	prolonged HP
RSL1D1	Missense	p.A7V	0.191	< 10	N/A	1.15	CG13096	6	constricted, reduced contractility
GDE1	Missense	p.V201L	0.045	16	N/A	0.6	CG14883	9	-
ACSF2	Missense	p.A260D	0.11	20	N/A	1.06	CG12512, pdgy	11; 3	prolonged HP*
