# Supplementary material for: Functional analysis across model systems implicates ribosomal proteins in growth and proliferation defects associated with hypoplastic left heart syndrome
Source: eLife. 2025 Dec 11;14:RP106231. doi: 10.7554/eLife.106231 (PMC12698088; doi:10.7554/eLife.106231)
Supplement: Supplementary file 9. [file elife-106231-supp9.xlsx]

## Sheet: Sheet1
RPS15a KD-CMs	log2FoldChange	pvalue		RPL39KD-CMs	log2FoldChange	pvalue		RPS15a KD-CMs	Normalized % EdU+CM
KIFC1	-2.16879	2.60019e-15		KIFC1	-2.59969	9.44264e-21		EWSR1	0.517291
PKMYT1	-2.00214	2.49896e-14		PKMYT1	-2.35329	1.52891e-18		PKMYT1	0.79284
HMGA1	-1.08576	3.77475e-08		HMGA1	-0.933408	1.38556e-06		DMD	0.797066
MDC1	-0.855976	1.80592e-10		MDC1	-1.07829	3.4746e-15		MDC1	0.833751
RABL6	-0.469476	3.14478e-05		RABL6	-0.470471	3.50139e-05		KIFC1	0.834044
EWSR1	-0.323313	0.00147255		EWSR1	-0.451313	2.48064e-05		SYNE1	0.971289
FAT4	0.254803	0.0460541		FAT4	0.367179	0.0116367		TTN	1.05852
TTN	0.594686	2.65953e-05		TTN	0.638153	4.91212e-06		HMGA1	1.11364
COL4A5	0.614801	2.04519e-05		COL4A5	0.453809	0.00102425		RABL6	1.11855
DMD	0.642083	9.0303e-09		DMD	0.482461	1.02469e-05		COL4A5	1.12229
SYNE1	0.852181	1.03763e-12		SYNE1	0.834024	2.69364e-12		FAT4	1.24748
EPHA4	0.980925	1.45733e-09		EPHA4	1.01287	4.8011e-10		EPHA4	1.30884
